# Supplementary material for: FAMoS: A Flexible and dynamic Algorithm for Model Selection to analyse complex systems dynamics
Source: PubMed Central journal article supplement (PMC6697322; doi:10.1371/journal.pcbi.1007230), 2019-08-16
Supplement: pcbi.1007230.s002.pdf [file pcbi.1007230.s002.pdf]

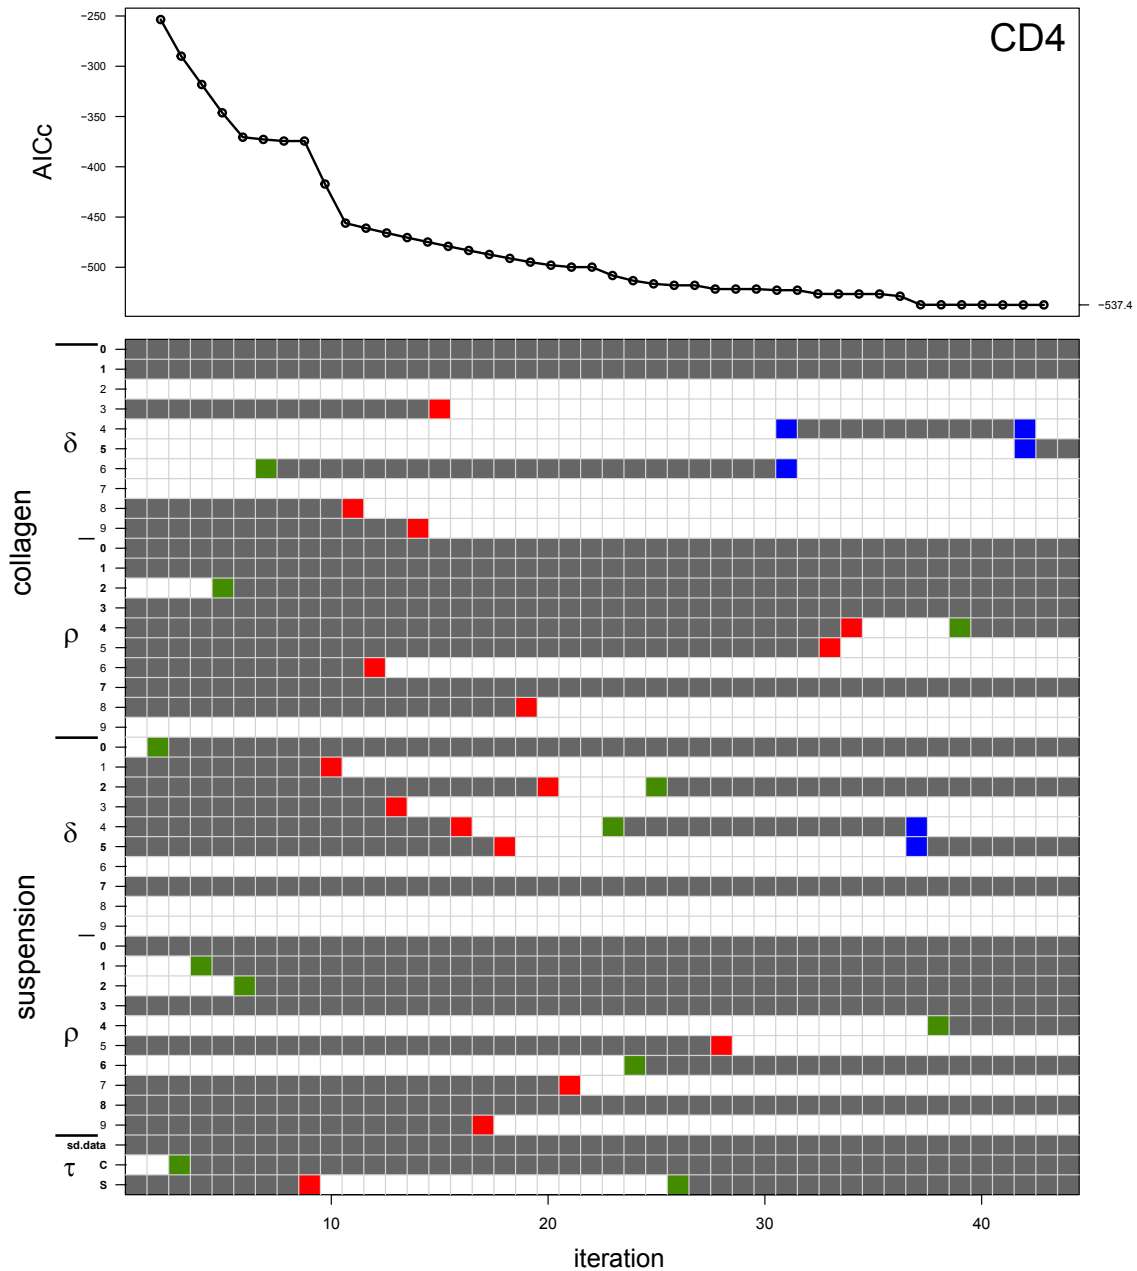

**Figure S2: Exemplary FAMoS-run analysing CD4<sup>+</sup> T cell dynamics:** Visualization of a single FAMoS-run over several iterations with the addition (*forward search*, green), removal (*backward elimination*, red) and swapping (*swap search*, blue) of parameters for analysing the turnover dynamics of CD4<sup>+</sup> T cells in suspension and collagen. Parameters that are selected in the final model with the denoted AICc-value of -537.4 are indicated in bold. The final run out of 5 individual FAMoS runs is shown.
