# Supplementary material for: FAMoS: A Flexible and dynamic Algorithm for Model Selection to analyse complex systems dynamics
Source: PubMed Central journal article supplement (PMC6697322; doi:10.1371/journal.pcbi.1007230), 2019-08-16
Supplement: pcbi.1007230.s005.pdf [file pcbi.1007230.s005.pdf]

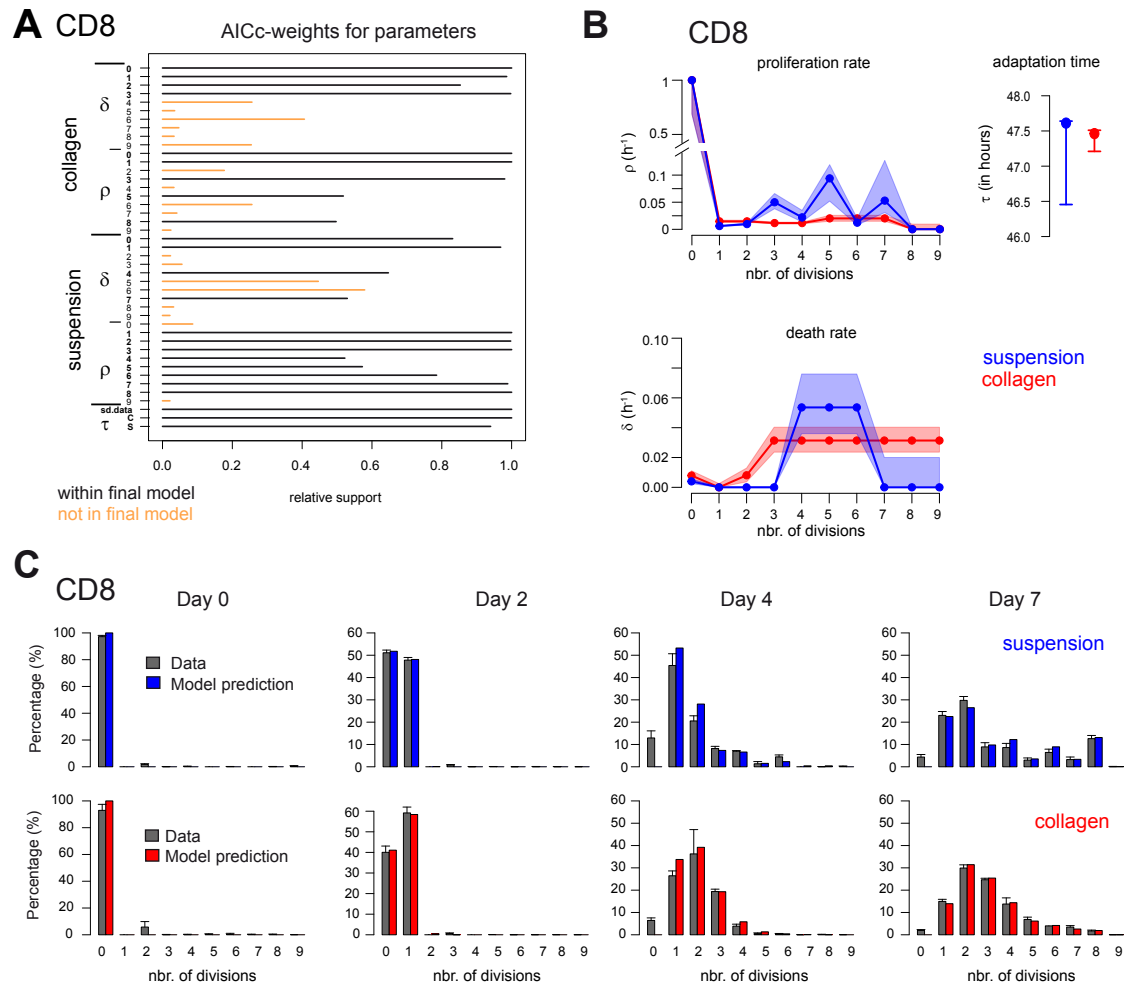

**Figure S5: Model selection and parameter estimates for CD8<sup>+</sup> T cell dynamics:** (A) Akaike weights for the individual parameters based on all model evaluations within the 5 independent FAMoS runs performed for the analysis of the CD8<sup>+</sup> T cells. Parameters selected within the final model are shown in black, non-selected parameters in orange. (B) Parameter estimates for the generation dependent proliferation ( $\rho$ ) and death ( $\delta$ ) rates, as well as adaptation times ( $\tau$ ) within suspension (blue) and collagen (red). Points define the best estimates with shaded areas indicating the 95% confidence intervals for each parameter determined by profile likelihood analysis (see Table 1 and S6 Figure for individual estimates). (C) Observed (grey) and predicted distribution of cell populations for CD8<sup>+</sup> T cells for using the best model estimated for each environment.
