# Supplementary material for: FAMoS: A Flexible and dynamic Algorithm for Model Selection to analyse complex systems dynamics
Source: PubMed Central journal article supplement (PMC6697322; doi:10.1371/journal.pcbi.1007230), 2019-08-16
Supplement: pcbi.1007230.s008.pdf [file pcbi.1007230.s008.pdf]

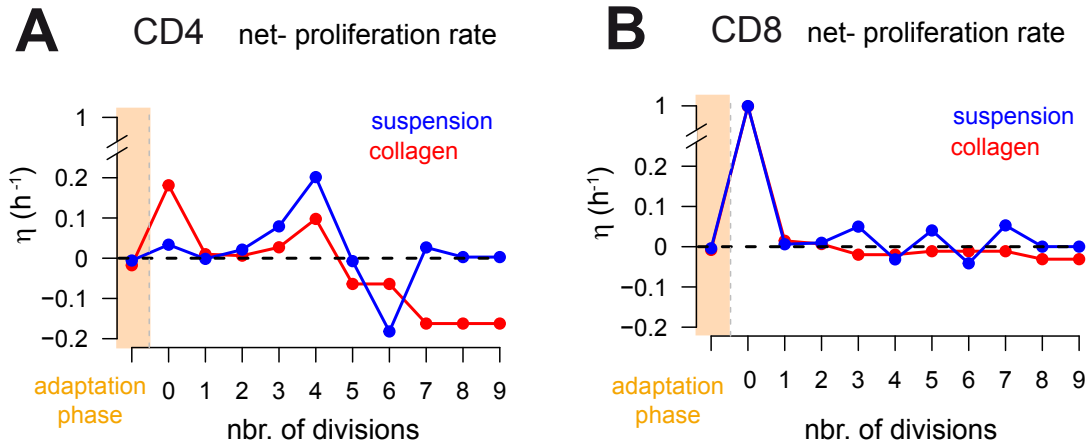

**Figure S8: Net-proliferation rates for different generations:** Determined net-proliferation rates,  $\eta_i = \rho_i - \delta_i$  for each generation  $i = 0, 1, \dots, 9$ , for CD4<sup>+</sup> (**A**) and CD8<sup>+</sup> (**B**) T cells in suspension (blue) and collagen (red). Calculations of the net-proliferation rates are based on the best estimates and shown in S1 Table. During the adaptation phase (orange), the net-proliferation rate is given by the estimated death rate  $\delta_0$  in the corresponding culture condition as during the adaptation phase all proliferation rates were set to 0,  $\rho_i = 0$ ,  $i = 0, 1, \dots, 9$ .
