# Supplementary material for: FAMoS: A Flexible and dynamic Algorithm for Model Selection to analyse complex systems dynamics
Source: PubMed Central journal article supplement (PMC6697322; doi:10.1371/journal.pcbi.1007230), 2019-08-16
Supplement: pcbi.1007230.s010.pdf [file pcbi.1007230.s010.pdf]

| generation<br>$\eta_i = \rho_i - \delta_i$ | Suspension                             |                                        | Collagen                               |                                        |
|--------------------------------------------|----------------------------------------|----------------------------------------|----------------------------------------|----------------------------------------|
|                                            | CD4 ( $\times 10^{-2} \text{h}^{-1}$ ) | CD8 ( $\times 10^{-2} \text{h}^{-1}$ ) | CD4 ( $\times 10^{-2} \text{h}^{-1}$ ) | CD8 ( $\times 10^{-2} \text{h}^{-1}$ ) |
| $\eta_0$                                   | 3.36                                   | 99.60                                  | 18.13                                  | 99.21                                  |
| $\eta_1$                                   | -0.16                                  | 0.61                                   | 0.99                                   | 1.47                                   |
| $\eta_2$                                   | 2.13                                   | 0.97                                   | 0.64                                   | 0.66                                   |
| $\eta_3$                                   | 7.91                                   | 4.99                                   | 2.71                                   | -1.98                                  |
| $\eta_4$                                   | 20.15                                  | -3.15                                  | 9.77                                   | -1.98                                  |
| $\eta_5$                                   | -0.73                                  | 4.04                                   | -6.39                                  | -1.12                                  |
| $\eta_6$                                   | -18.20                                 | -4.13                                  | -6.39                                  | -1.12                                  |
| $\eta_7$                                   | 2.68                                   | 5.29                                   | -16.23                                 | -1.12                                  |
| $\eta_8$                                   | 0.28                                   | 0.01                                   | -16.23                                 | -3.10                                  |
| $\eta_9$                                   | 0.28                                   | 0.01                                   | -16.23                                 | -3.10                                  |

**Table S1: Net-proliferation rates for different generations:** The calculated net-proliferation rates for each generation with  $\eta_i = \rho_i - \delta_i$  and  $i = 0, \dots, 9$  indicating the number of previous divisions. Rates are calculated based on the best estimates obtained for the models identified for each cell type and culture condition (see Table 1 in the main manuscript).
